# Supplementary material
Source: PubMed Central journal article supplement (PMC4366580)
Supplement: supp_ciu868_ciu868supp.pdf [file supp_ciu868_ciu868supp.pdf]

**Supplemental Table 1. Published pharmacokinetic studies of moxifloxacin in adults and children with tuberculosis.**

| Study                         | Disease       | HIV | Age         | Bodyweight (kg)         | N  | Mfx dose                            | T <sub>max</sub> (h)       | t <sub>1/2</sub> (h)          | C <sub>max</sub> (µg/ml)    | AUC <sub>0-24</sub> (µg·h/ml) | AUC <sub>0-inf</sub> (µg·h/ml) | AUC <sub>other</sub> (µg·h/ml)                   |
|-------------------------------|---------------|-----|-------------|-------------------------|----|-------------------------------------|----------------------------|-------------------------------|-----------------------------|-------------------------------|--------------------------------|--------------------------------------------------|
| <b>Adults</b>                 |               |     |             |                         |    |                                     |                            |                               |                             |                               |                                |                                                  |
| Johnson JL, et al. 2006 [8]   | TB            | 0   | 35 (25-37)  | 56 (50-60)              | 10 | 400mg orally                        | 1.0 <sup>a</sup> (1.0-2.0) | 8.1 <sup>a</sup> (5.1-9.9)    | 6.1 <sup>a</sup> (4.5-9.0)  | 55.3 <sup>a</sup> (36.0-79.1) |                                |                                                  |
| Nijland HMJ, et al. 2007 [11] | TB            |     | 30 (20-55)  | 55 <sup>a</sup> (38-80) | 19 | 400mg orally (with 450mg RMP)       | 2.5 <sup>a</sup> (0.5-6.0) | 7.1 <sup>a</sup> (5.0-9.6)    | 3.2 <sup>a</sup> (2.5-4.5)  | 33.3 <sup>a</sup> (25.1-55.5) |                                |                                                  |
|                               |               |     |             |                         | 19 | 400mg orally                        | 1.0 <sup>a</sup> (0.5-3.0) | 9.9 <sup>a</sup> (7.4-14.0)   | 4.7 <sup>a</sup> (3.4-6.0)  | 48.2 <sup>a</sup> (37.2-60.5) |                                |                                                  |
| Peloquin CA, et al. 2008 [12] | TB            |     | 35 (18-46)  | 56 <sup>b</sup> (43-69) | 9  | 400mg orally                        | 1.0 <sup>a</sup> (1.0-2.0) | 6.53 <sup>a</sup> (4.25-10.6) | 6.13 <sup>a</sup> (4.5-9.0) | 60 <sup>a</sup> (24-140)      |                                |                                                  |
| Pranger AD, et al. 2011 [10]  | TB            |     | adults      |                         | 16 | 400mg orally (with and without RMP) | 1 <sup>a</sup> (1-2)       | 8 <sup>a</sup> (6-10)         | 2.5 <sup>a</sup> (2.0-2.9)  | 24.9 <sup>a</sup> (20.7-35.2) |                                |                                                  |
| Zvada SP, et al. 2012 [13]    | TB            |     | 40 (21-51)  | 52 <sup>b</sup> (42-71) | 27 | 400mg orally                        |                            |                               | 3.8 <sup>a</sup> (2.1-4.6)  |                               | 50.8 <sup>a</sup> (31.8-65.3)  |                                                  |
| Manika K, et al. 2012 [14]    | MDR/XDR-TB    | 0/7 | 40.1 (15.7) |                         | 7  | 400mg orally                        | 2.36 <sup>b</sup> (0.56)   |                               | 4.59 <sup>b</sup> (2.06)    | 37.96 <sup>b</sup> (16.5)     |                                |                                                  |
| Ruslami R, et al. 2013 [15]   | TB-meningitis |     | 18-60       | 47-50                   | 19 | 400mg orally (plus RMP)             | 2 <sup>a</sup> (1-6)       |                               | 3.9 <sup>b</sup> (3.2-4.8)  | 28.6 <sup>b</sup> (24.2-33.8) |                                | AUC <sub>0-6</sub> 15.1 <sup>b</sup> (12.8-17.7) |
|                               |               |     | 18-64       |                         | 16 | 800mg orally (plus RMP)             | 2 <sup>a</sup> (1-6)       |                               | 7.4 <sup>b</sup> (5.6-9.6)  | 60.4 <sup>b</sup> (45.4-80.3) |                                | AUC <sub>0-6</sub> 28.6 <sup>b</sup> (24.2-33.8) |

**Children**

---

|                                        |     |      |      |    |                   |                                   |                                |                                |                                   |                                                     |
|----------------------------------------|-----|------|------|----|-------------------|-----------------------------------|--------------------------------|--------------------------------|-----------------------------------|-----------------------------------------------------|
| Thee S, et al.<br>(current<br>article) | MDR | 6/23 | 8-15 | 23 | 10mg/kg<br>orally | 2.0 <sup>a</sup><br>(1.0-<br>8.0) | 4.14 <sup>a</sup><br>(3.5-6.1) | 3.08 <sup>a</sup><br>(2.9-3.8) | 23.31 <sup>a</sup><br>(19.2-42.3) | AUC <sub>0-8</sub> 17.2 <sup>a</sup><br>(14.5-22.0) |
|----------------------------------------|-----|------|------|----|-------------------|-----------------------------------|--------------------------------|--------------------------------|-----------------------------------|-----------------------------------------------------|

---

a) reported as median (range); b) reported as mean (standard deviation)

Mfx=moxifloxacin
